# Supplementary material for: Transglutaminase 2 Facilitates Murine Wound Healing in a Strain-Dependent Manner
Source: MDPI journal article supplement (doi:10.3390/ijms241411475), 2023-07-14
Supplement: s1 [file s1]

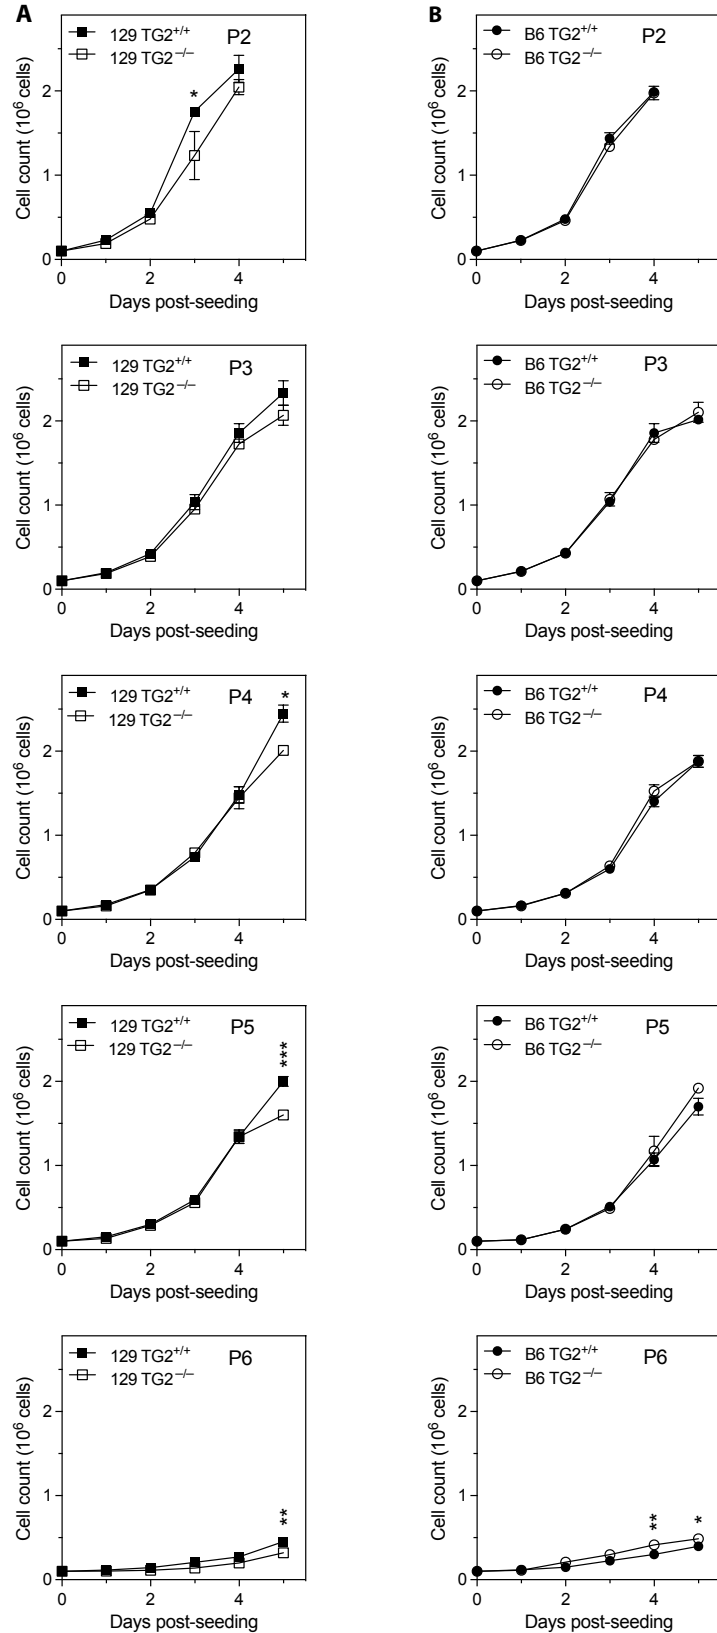

**Figure S1.** MEF proliferation was drastically reduced with increasing passages. Random batches of (A) 129 and (B) B6 TG2<sup>+/+</sup> and TG2<sup>-/-</sup> MEFs ( $n = 3$ ) were monitored for growth rate at passage 2 (P2), P3, P4, P5 and P6. At P2, cells reached confluence on day 4 and for subsequent passages, up to P5, confluence was reached on day 5. Cells were split on the day they reached confluency. MEFs did not propagate beyond P6. \*,  $p < 0.05$ ; \*\*,  $p < 0.01$ , \*\*\*,  $p < 0.001$  for two-way ANOVA with post hoc Bonferroni correction.

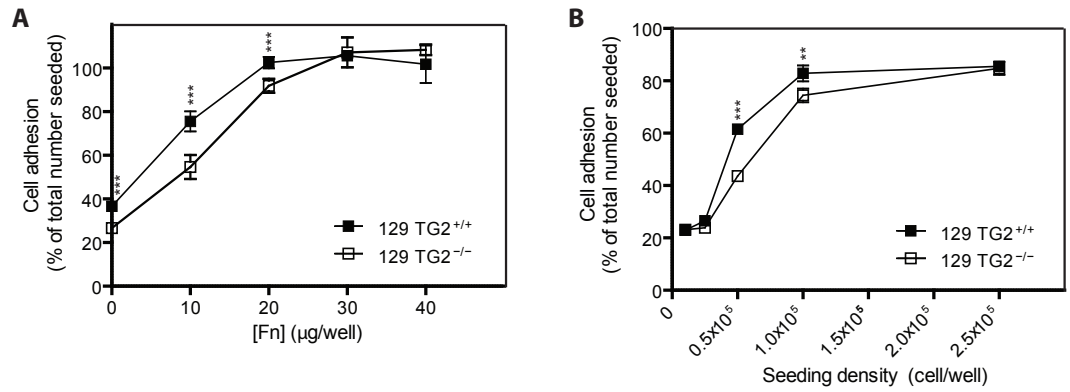

**Figure S2.** Effect of fibronectin (Fn) concentration or seeding density on adhesion of 129 TG2<sup>+/+</sup> and 129 TG2<sup>-/-</sup> MEFs. **(A)** Fifty thousand 129 TG2<sup>+/+</sup> or TG2<sup>-/-</sup> MEFs were seeded onto wells of a 24-well plate that were pre-coated with 0 to 40 μg Fn/cm<sup>2</sup> and adherent cells were quantitated after 30 min ( $n = 3$  experiments, in triplicate). **(B)** 129 TG2<sup>+/+</sup> or TG2<sup>-/-</sup> MEFs were seeded at increasing density onto wells of a 24-well plate pre-coated with 10 μg Fn/cm<sup>2</sup> and adherent cells were quantitated after 30 min ( $n = 3$  experiments performed in triplicate). The greatest difference in adhesion of 129 TG2<sup>+/+</sup> and TG2<sup>-/-</sup> MEFs was observed with a Fn concentration of 10 μg/cm<sup>2</sup> and a cell density of 5x10<sup>4</sup>/cm<sup>2</sup>. \*\*,  $p < 0.01$ ; \*\*\*,  $p < 0.001$  for two-way ANOVA with post hoc Bonferroni correction.

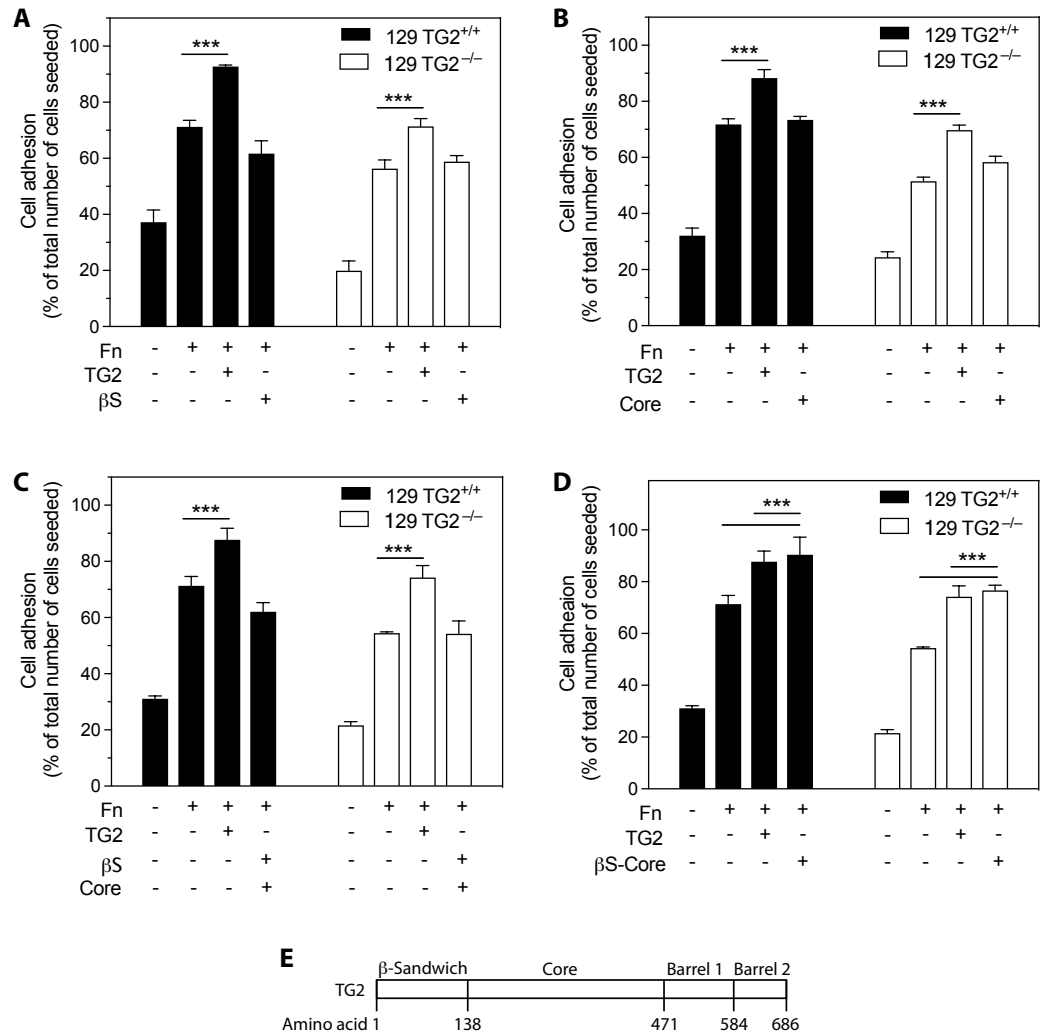

**Figure S3.** The  $\beta$ -sandwich-core domain of TG2, but not the  $\beta$ -sandwich or core domain alone, was able to substitute for full-length TG2 to increase the number of adherent 129 TG2<sup>+/+</sup> and 129 TG2<sup>-/-</sup> MEFs. (**A, B, C, D**) Quantitation of adherent 129 TG2<sup>+/+</sup> or 129 TG2<sup>-/-</sup> MEFs after 30 min incubation on plates coated without Fn, with Fn alone, with Fn plus full-length TG2 (20  $\mu$ g/cm<sup>2</sup>), or with Fn plus equivalent molar amounts of (A)  $\beta$ -sandwich domain of TG2 (amino acids 1-138, [59]) ( $n = 3$  experiments performed in triplicate), (B) core domain of TG2 (amino acids 139-471, [59]) ( $n = 3$  experiments performed in triplicate), (C)  $\beta$ -sandwich and core domains of TG2 ( $n = 4$  experiments performed in triplicate) or (D)  $\beta$ -sandwich-core domain of TG2 (amino acids 1-471, [59]) ( $n = 4$  experiments performed in triplicate), expressed as a percentage of the total number of cells ( $5 \times 10^4$ ) seeded. (**E**) Diagrammatic representation of the domain structure of full-length TG2. \*\*\*,  $p < 0.001$  for a two tailed Student t-test.

**Table S1.** Genes with mRNA abundance changes of at least 0.1 log-fold ( $p < 0.05$ ) from microarray analysis of total RNA from 129 TG2<sup>-/-</sup> and 129 TG2<sup>+/+</sup> skin wounds.

| Gene symbol            | log-fold change | p.value  |
|------------------------|-----------------|----------|
| Tgm2                   | -2.25266        | 3.61E-08 |
| Mup2                   | -0.99513        | 0.044244 |
| Rrad                   | -0.94954        | 0.002651 |
| Klhl31                 | -0.89374        | 0.028146 |
| Apobec2                | -0.86925        | 0.008187 |
| Xirp2                  | -0.85486        | 0.029905 |
| Smpx                   | -0.84001        | 0.008905 |
| Kbtbd10                | -0.83936        | 0.014641 |
| Myoz2                  | -0.76154        | 0.028233 |
| Asb5                   | -0.71936        | 0.035307 |
| Nrap                   | -0.71351        | 0.0372   |
| Lrrc2                  | -0.69317        | 0.032042 |
| Des                    | -0.68684        | 0.024143 |
| Tnnc2                  | -0.6663         | 0.042856 |
| Tnni2                  | -0.62209        | 0.046102 |
| Mb                     | -0.61904        | 0.030163 |
| Srl                    | -0.61187        | 0.032999 |
| Mustn1                 | -0.58975        | 0.012266 |
| Pkia                   | -0.58651        | 0.031822 |
| Mylk2                  | -0.58112        | 0.037744 |
| Mmp13                  | -0.55315        | 0.023628 |
| Usp13                  | -0.54959        | 0.018649 |
| EG382931               | -0.54584        | 0.004871 |
| Acta1                  | -0.54158        | 0.040607 |
| Tspan8                 | -0.53317        | 0.043318 |
| EG667441               | -0.52767        | 0.003546 |
| 100039528              | -0.5065         | 0.010237 |
| Gadl1                  | -0.48945        | 0.027436 |
| Eef1a2                 | -0.48938        | 0.030035 |
| Asb14                  | -0.48806        | 0.028284 |
| Rragd                  | -0.47859        | 0.016296 |
| Cox6a2                 | -0.46071        | 0.038904 |
| OTTMUSG000000177<br>46 | -0.45821        | 0.001451 |
| Tas2r135               | -0.45336        | 0.006623 |
| Cryab                  | -0.45185        | 0.044414 |
| Prkg1                  | -0.44182        | 0.048171 |
| Trim72                 | -0.44149        | 0.022915 |
| Lmod2                  | -0.43139        | 0.036902 |
| Olf1148                | -0.41777        | 0.002768 |
| Myo18b                 | -0.41563        | 0.039337 |
| AA416372               | -0.41311        | 0.011337 |
| LOC100045610           | -0.41165        | 0.025075 |
| Serp1b1a               | -0.40274        | 0.031873 |
| Dusp27                 | -0.3998         | 0.025337 |
| Myo18b                 | -0.39751        | 0.010706 |

|                    |          |          |
|--------------------|----------|----------|
| OTTMUSG00000007808 | -0.37206 | 0.022392 |
| ENSMUSG00000074845 | -0.3579  | 0.004762 |
| Cnksr1             | -0.35501 | 0.036583 |
| Kcnc4              | -0.35324 | 0.006386 |
| Ptgs2              | -0.35217 | 0.047123 |
| Khdc1a             | -0.34369 | 0.002499 |
| Unc45b             | -0.3436  | 0.04265  |
| Lrm1               | -0.3406  | 0.045767 |
| Tgm7               | -0.33956 | 0.015476 |
| Smtnl1             | -0.3395  | 0.003997 |
| Olfr310            | -0.33731 | 0.002365 |
| OTTMUSG00000007474 | -0.33113 | 0.032497 |
| Tas2r143           | -0.32702 | 0.016844 |
| Myo18b             | -0.32498 | 0.042229 |
| Fbxo40             | -0.32312 | 0.009443 |
| Atp1b1             | -0.32139 | 0.012909 |
| Kcna7              | -0.32006 | 0.002281 |
| Sync               | -0.31903 | 0.041394 |
| Olfr373            | -0.31845 | 0.025584 |
| Kcnq5              | -0.31399 | 0.032714 |
| Apcs               | -0.31358 | 0.009282 |
| Krtap5-1           | -0.31254 | 0.002391 |
| Musk               | -0.30698 | 0.03447  |
| Abcb4              | -0.30549 | 0.020088 |
| lhpk3              | -0.30523 | 0.025864 |
| Olfr605            | -0.30324 | 0.026712 |
| Klk1b24            | -0.30161 | 0.022554 |
| C1qtnf3            | -0.29754 | 0.005602 |
| Ak1                | -0.29567 | 0.020939 |
| Olfr239            | -0.29538 | 0.005394 |
| Sh3bgr             | -0.29536 | 0.038447 |
| F2rl3              | -0.28792 | 0.003993 |
| Cfl2               | -0.28769 | 0.045883 |
| ENSMUSG00000073569 | -0.28152 | 0.010332 |
| Gm996              | -0.27902 | 0.021061 |
| EG218444           | -0.27871 | 0.029302 |
| Kir3dl1            | -0.27604 | 0.032181 |
| Synpo2l            | -0.27513 | 0.037758 |
| Ociad2             | -0.26812 | 0.017785 |
| ENSMUSG00000072690 | -0.26491 | 0.019088 |
| Olfr1031           | -0.2636  | 0.010467 |
| OTTMUSG00000008822 | -0.25881 | 0.001785 |
| LOC627626          | -0.25802 | 0.04568  |
| Vmn2r87            | -0.25161 | 0.032898 |
| EG620119           | -0.25148 | 0.038811 |
| Olfr957            | -0.24796 | 0.024398 |
| Avpr2              | -0.24754 | 0.008686 |
| A130082M07Rik      | -0.24699 | 0.032031 |
| Crhr2              | -0.24566 | 0.01745  |

|                    |          |          |
|--------------------|----------|----------|
| Dnajc5b            | -0.24429 | 0.04422  |
| Srms               | -0.24408 | 0.004572 |
| Sema6c             | -0.24207 | 0.010198 |
| Hormad1            | -0.24167 | 0.01298  |
| Rprm               | -0.24065 | 0.018237 |
| LOC676914          | -0.24041 | 0.035641 |
| Mkm3               | -0.24009 | 0.002989 |
| Shisa2             | -0.23957 | 0.031507 |
| Mmp10              | -0.23896 | 0.032533 |
| Stac3              | -0.23867 | 0.017624 |
| OTTMUSG00000005131 | -0.2384  | 0.016192 |
| Gpr25              | -0.23838 | 0.005103 |
| 100040113          | -0.238   | 0.005613 |
| LOC100048255       | -0.2379  | 0.026365 |
| Myh6               | -0.23537 | 0.017544 |
| EG628893           | -0.23427 | 0.020705 |
| Olf1364            | -0.23272 | 0.012392 |
| Itgb1bp3           | -0.23242 | 0.044022 |
| Lmbr1              | -0.23241 | 0.041136 |
| 6430517E21Rik      | -0.2322  | 0.000818 |
| Kcnj11             | -0.23219 | 0.010002 |
| Lrrtm3             | -0.23208 | 0.015281 |
| Speer2             | -0.23139 | 0.021965 |
| Neurl              | -0.23124 | 0.038216 |
| Sema4g             | -0.23079 | 0.004594 |
| ENSMUSG00000074555 | -0.22825 | 0.014433 |
| Cyp2d10            | -0.22825 | 0.016883 |
| ENSMUSG00000074072 | -0.22796 | 0.008609 |
| Igk-V1             | -0.22514 | 0.047424 |
| EG666123           | -0.22489 | 0.036902 |
| Tgfb2              | -0.22473 | 0.021239 |
| Mpo                | -0.22439 | 0.047303 |
| 1110030E23Rik      | -0.22397 | 0.042011 |
| Slco5a1            | -0.22337 | 0.024639 |
| Olf1350            | -0.22327 | 0.037706 |
| Hspb2              | -0.22282 | 0.046337 |
| Tas2r129           | -0.22235 | 0.02447  |
| 9430060I03Rik      | -0.22189 | 0.019093 |
| Htr5b              | -0.22179 | 0.005622 |
| EG546708           | -0.22176 | 0.017049 |
| Tnnt2              | -0.22158 | 0.036705 |
| Kcnj5              | -0.22149 | 0.019185 |
| 621968             | -0.2203  | 0.017832 |
| EG624023           | -0.22    | 0.048371 |
| ENSMUSG00000071392 | -0.21964 | 0.017485 |
| A430072C10Rik      | -0.21912 | 0.02293  |
| LOC622659          | -0.21763 | 0.02644  |
| Atp8b3             | -0.21726 | 0.035614 |
| B4galnt2           | -0.21711 | 0.038741 |

|                    |          |          |
|--------------------|----------|----------|
| Syt10              | -0.21669 | 0.008492 |
| Il28a              | -0.21598 | 0.041862 |
| Hspb3              | -0.21593 | 0.044028 |
| Slc23a1            | -0.21577 | 0.009136 |
| V1rd15             | -0.21545 | 0.04634  |
| EG668156           | -0.21545 | 0.037941 |
| Fgf20              | -0.21528 | 0.010173 |
| Olfra464           | -0.2139  | 0.04477  |
| Nlrp14             | -0.21383 | 0.013414 |
| Sox8               | -0.21327 | 0.011115 |
| 4930471G03Rik      | -0.21295 | 0.015523 |
| Olfra557           | -0.21231 | 0.019395 |
| Ovol3              | -0.21086 | 0.042808 |
| V1rg6              | -0.21053 | 0.039398 |
| Ctsa               | -0.21018 | 0.031171 |
| Taar5              | -0.21009 | 0.032926 |
| Isl1               | -0.20826 | 0.01206  |
| V1rg8              | -0.20754 | 0.039637 |
| Nefl               | -0.20715 | 0.010202 |
| Camp               | -0.20697 | 0.023225 |
| Glyctk             | -0.20654 | 0.032992 |
| Skap1              | -0.20633 | 0.021563 |
| H2-M10.2           | -0.20491 | 0.012051 |
| Insm2              | -0.20431 | 0.018205 |
| Col4a6             | -0.20428 | 0.012816 |
| Tgif2              | -0.20409 | 0.035834 |
| Ppifos             | -0.20385 | 0.005462 |
| Tff2               | -0.20356 | 0.010665 |
| Tmem139            | -0.20348 | 0.029328 |
| Rdh19              | -0.20301 | 0.012137 |
| Pnma3              | -0.20294 | 0.008392 |
| Gpr158             | -0.20282 | 0.010118 |
| EG382156           | -0.2027  | 0.042222 |
| D430041D05Rik      | -0.20182 | 0.019249 |
| A930035D04Rik      | -0.20025 | 0.039357 |
| 2610021K21Rik      | -0.20007 | 0.032767 |
| Pdc                | -0.19977 | 0.015245 |
| Slc13a4            | -0.19975 | 0.034007 |
| 9530053H05Rik      | -0.19967 | 0.018619 |
| 1700013G24Rik      | -0.19941 | 0.016036 |
| OTTMUSG00000023126 | -0.19927 | 0.04429  |
| 1110001D15Rik      | -0.19908 | 0.034463 |
| LOC546695          | -0.19805 | 0.043672 |
| Adams3             | -0.19781 | 0.039381 |
| Cnih3              | -0.19755 | 0.041114 |
| 3322402L07Rik      | -0.19744 | 0.020407 |
| Megf6              | -0.19718 | 0.038448 |
| LOC100044855       | -0.19691 | 0.006297 |
| Nhedc2             | -0.19635 | 0.025083 |

|               |          |          |
|---------------|----------|----------|
| Wdr16         | -0.19615 | 0.007324 |
| 4921530L21Rik | -0.196   | 0.026632 |
| Olfr1272      | -0.1959  | 0.039068 |
| Tram111       | -0.19529 | 0.015511 |
| LOC100045615  | -0.19484 | 0.029621 |
| Kif12         | -0.19365 | 0.008537 |
| Mycs          | -0.19298 | 0.032547 |
| Prhoxnb       | -0.19294 | 0.0344   |
| Gast          | -0.19274 | 0.016107 |
| V1ra2         | -0.1926  | 0.041092 |
| Hsf2          | -0.19221 | 0.039006 |
| Kcnh7         | -0.1918  | 0.02181  |
| Pcsk9         | -0.19055 | 0.020233 |
| Olfr611       | -0.19046 | 0.035995 |
| Ctsr          | -0.19029 | 0.009526 |
| 4921509A18Rik | -0.19007 | 0.009605 |
| Dab1          | -0.18971 | 0.031283 |
| EG639530      | -0.18961 | 0.011469 |
| Slc6a15       | -0.18943 | 0.038577 |
| Lefty2        | -0.18915 | 0.039255 |
| Cd209e        | -0.18902 | 0.035945 |
| Egfl6         | -0.18884 | 0.023113 |
| Rit2          | -0.1873  | 0.038794 |
| Olfr1511      | -0.18713 | 0.035411 |
| Gm568         | -0.18684 | 0.019182 |
| Glis1         | -0.18679 | 0.0267   |
| Amhr2         | -0.18668 | 0.013659 |
| Wdr31         | -0.18623 | 0.016842 |
| Cacna1g       | -0.18563 | 0.039921 |
| Crygn         | -0.18554 | 0.01444  |
| Ica1l         | -0.18553 | 0.007614 |
| Plb1          | -0.18552 | 0.029057 |
| Vgll1         | -0.1855  | 0.022826 |
| Tcp11         | -0.18545 | 0.014324 |
| Pga5          | -0.18539 | 0.017111 |
| Sh3rf3        | -0.18413 | 0.006472 |
| Slc12a5       | -0.18403 | 0.023018 |
| Olfr180       | -0.1836  | 0.01275  |
| Chrna9        | -0.18355 | 0.042787 |
| Gpr20         | -0.18354 | 0.044477 |
| Col9a3        | -0.18292 | 0.020421 |
| EG218997      | -0.1823  | 0.042421 |
| Olfr390       | -0.18181 | 0.046352 |
| Apol8         | -0.18176 | 0.02744  |
| Sstr2         | -0.18175 | 0.029653 |
| Sphkap        | -0.18147 | 0.014015 |
| Zfp651        | -0.1814  | 0.029486 |
| Prf1          | -0.18136 | 0.028853 |
| Olfr1305      | -0.18133 | 0.040487 |



|                    |          |          |
|--------------------|----------|----------|
| Nr2e3              | -0.18084 | 0.013504 |
| Dcakd              | -0.18079 | 0.019358 |
| A4gnt              | -0.18067 | 0.009931 |
| Stmn3              | -0.18059 | 0.016294 |
| Dnajc6             | -0.18034 | 0.023619 |
| Zfp264             | -0.18011 | 0.01628  |
| Cntnap5c           | -0.17983 | 0.021066 |
| Mos                | -0.17924 | 0.016024 |
| Banf2              | -0.17861 | 0.010025 |
| 2810051F02Rik      | -0.17849 | 0.049897 |
| Igf2as             | -0.17833 | 0.011878 |
| Em2                | -0.17748 | 0.021993 |
| Cryba4             | -0.17684 | 0.038092 |
| Cst11              | -0.17671 | 0.042793 |
| Slc6a3             | -0.17656 | 0.018306 |
| Ina                | -0.17641 | 0.032588 |
| Olf1231            | -0.1762  | 0.044051 |
| Nlgn1              | -0.1759  | 0.021283 |
| EG330305           | -0.17566 | 0.036242 |
| Il27               | -0.17562 | 0.038789 |
| Vax2               | -0.17526 | 0.014942 |
| 2900005J15Rik      | -0.17507 | 0.041133 |
| Myo18b             | -0.1738  | 0.015721 |
| Olf157             | -0.1732  | 0.033746 |
| Tchhl1             | -0.17295 | 0.033893 |
| Rhcg               | -0.17188 | 0.022235 |
| Lrrc50             | -0.17176 | 0.047765 |
| Slc25a29           | -0.17147 | 0.026488 |
| Bmp8b              | -0.17092 | 0.032086 |
| Prdm13             | -0.17076 | 0.018772 |
| 1600012P17Rik      | -0.17036 | 0.019166 |
| Lrfr1              | -0.1701  | 0.046124 |
| EG629583           | -0.17007 | 0.033131 |
| Impg2              | -0.16989 | 0.0315   |
| Mug1               | -0.16977 | 0.025881 |
| Ppm1e              | -0.16964 | 0.015225 |
| Aqp12              | -0.16946 | 0.018625 |
| 1700018M17Rik      | -0.16859 | 0.03948  |
| Htr2b              | -0.16841 | 0.040263 |
| ENSMUSG00000072619 | -0.16716 | 0.047356 |
| Clec4a4            | -0.16655 | 0.015616 |
| Tmem91             | -0.1663  | 0.016442 |
| Ank1               | -0.16568 | 0.018855 |
| Serpina5           | -0.16544 | 0.047745 |
| Kifc5c             | -0.16531 | 0.011217 |
| Fgf12              | -0.16442 | 0.023106 |
| Slc1a4             | -0.16403 | 0.027653 |
| Otos               | -0.16399 | 0.03192  |
| Fstl4              | -0.16383 | 0.02757  |

|                    |          |          |
|--------------------|----------|----------|
| Ak5                | -0.16355 | 0.046123 |
| Gpr3               | -0.16352 | 0.031405 |
| Spink4             | -0.16272 | 0.047458 |
| Rbm11              | -0.16256 | 0.048175 |
| Adra2c             | -0.16253 | 0.033032 |
| Slc13a5            | -0.16207 | 0.007239 |
| EG546638           | -0.16161 | 0.035673 |
| Gm1323             | -0.16143 | 0.031838 |
| 2810055G20Rik      | -0.16082 | 0.049596 |
| Dyx1c1             | -0.16031 | 0.013626 |
| Olf1030            | -0.16031 | 0.037131 |
| Phxr1              | -0.16016 | 0.03811  |
| Ccdc136            | -0.16002 | 0.014545 |
| Nkx6-1             | -0.16001 | 0.038953 |
| Ncf2               | -0.15962 | 0.049651 |
| Onecut1            | -0.15961 | 0.049195 |
| D930048N14Rik      | -0.15922 | 0.047464 |
| Abcc8              | -0.15775 | 0.034015 |
| Traf4              | -0.15747 | 0.039724 |
| Stmn4              | -0.15637 | 0.024327 |
| 4930550C14Rik      | -0.15611 | 0.042949 |
| Cd276              | -0.15584 | 0.038204 |
| Gm8                | -0.15563 | 0.030321 |
| ENSMUSG00000052323 | -0.15496 | 0.030708 |
| Rhox6              | -0.15493 | 0.029318 |
| Acpt               | -0.15452 | 0.043986 |
| Artn               | -0.15373 | 0.01941  |
| Olf1038            | -0.15273 | 0.031516 |
| Slc17a3            | -0.1516  | 0.038747 |
| Zbtb8b             | -0.15149 | 0.027241 |
| Icam5              | -0.15137 | 0.023742 |
| 2810453I06Rik      | -0.15102 | 0.031768 |
| Nhs                | -0.1507  | 0.047212 |
| Thsd3              | -0.15032 | 0.046399 |
| Pramel7            | -0.15016 | 0.044338 |
| Zfp689             | -0.14997 | 0.019808 |
| EG620899           | -0.14978 | 0.021945 |
| Cck                | -0.14973 | 0.031675 |
| Bfsp2              | -0.14951 | 0.038984 |
| BC038167           | -0.14941 | 0.036212 |
| Slamf8             | -0.14918 | 0.049948 |
| Gpr142             | -0.14902 | 0.02518  |
| Pou2f2             | -0.14802 | 0.018496 |
| Wnk2               | -0.14797 | 0.01935  |
| Prss29             | -0.14794 | 0.029931 |
| Hydin              | -0.14739 | 0.037273 |
| EG622432           | -0.14721 | 0.046542 |
| Olf791             | -0.14695 | 0.045341 |
| Rgn                | -0.14643 | 0.029192 |

|                    |          |          |
|--------------------|----------|----------|
| Dak                | -0.14491 | 0.047288 |
| 5830411N06Rik      | -0.14479 | 0.035918 |
| Nrl                | -0.14419 | 0.037786 |
| Dusp9              | -0.14418 | 0.041152 |
| Hes5               | -0.14398 | 0.027345 |
| EG629678           | -0.14387 | 0.045344 |
| OTTMUSG00000005162 | -0.14352 | 0.028509 |
| Wipf3              | -0.14295 | 0.027382 |
| EG665887           | -0.14186 | 0.046253 |
| Tcea1              | -0.14162 | 0.024619 |
| Dpf1               | -0.14142 | 0.045677 |
| Spinlw1            | -0.14136 | 0.04584  |
| Slitrk3            | -0.14058 | 0.022219 |
| Arhgdig            | -0.14054 | 0.035177 |
| LOC100048615       | -0.14043 | 0.030577 |
| Tex16              | -0.1396  | 0.044328 |
| Rnf186             | -0.13857 | 0.039831 |
| BC043934           | -0.13773 | 0.04458  |
| Col19a1            | -0.13695 | 0.023405 |
| Crisp3             | -0.13678 | 0.041669 |
| Fbxl7              | -0.13608 | 0.047813 |
| Rpap1              | -0.13509 | 0.0289   |
| Zfp358             | -0.13493 | 0.048833 |
| Slc1a6             | -0.13428 | 0.047418 |
| ENSMUSG00000049982 | -0.13358 | 0.029368 |
| Atad4              | -0.13325 | 0.040191 |
| Adamts15           | -0.13252 | 0.030539 |
| Arl4c              | -0.13226 | 0.04505  |
| V1rc16             | -0.13158 | 0.037491 |
| Serpib1c           | -0.13072 | 0.049047 |
| Barhl2             | -0.12939 | 0.037136 |
| Prss32             | -0.12618 | 0.027336 |
| Olf66              | -0.12356 | 0.04886  |
| Sstr1              | -0.11816 | 0.04312  |
| EG631906           | -0.11723 | 0.038677 |
| V1rh2              | -0.11359 | 0.049585 |
| Lrrc29             | -0.11157 | 0.038377 |
| 1200015N20Rik      | 0.105208 | 0.04804  |
| Kctd20             | 0.111652 | 0.040691 |
| Rars2              | 0.114474 | 0.041733 |
| Usp21              | 0.114958 | 0.047303 |
| Cnot10             | 0.115514 | 0.047523 |
| Lsg1               | 0.117324 | 0.047156 |
| Pbx2               | 0.117646 | 0.047072 |
| Glg1               | 0.117736 | 0.049863 |
| Phc3               | 0.117804 | 0.037574 |
| BC059842           | 0.118284 | 0.035235 |
| Recql              | 0.118483 | 0.044592 |
| Arl3               | 0.118555 | 0.045619 |

|               |          |          |
|---------------|----------|----------|
| Plekhm2       | 0.119989 | 0.033429 |
| Fastkd1       | 0.121105 | 0.04413  |
| Syne2         | 0.122441 | 0.04908  |
| App           | 0.122855 | 0.048423 |
| Zfp276        | 0.122915 | 0.046392 |
| Sap130        | 0.12365  | 0.030179 |
| Mlit1         | 0.124156 | 0.043126 |
| Dapk1         | 0.124513 | 0.047912 |
| Klhl18        | 0.124718 | 0.04767  |
| Pik3ca        | 0.124719 | 0.02558  |
| Fastkd5       | 0.125223 | 0.030588 |
| Nme1          | 0.12541  | 0.041183 |
| 1700011F03Rik | 0.125413 | 0.033099 |
| Rint1         | 0.125734 | 0.038098 |
| Nxt1          | 0.125739 | 0.036926 |
| Zfp294        | 0.12579  | 0.04059  |
| Hmg20a        | 0.125886 | 0.035696 |
| Them4         | 0.126169 | 0.022123 |
| Prrg2         | 0.126269 | 0.046693 |
| Shq1          | 0.126456 | 0.029047 |
| Qrs1          | 0.127063 | 0.044299 |
| 4932442K08Rik | 0.127259 | 0.036141 |
| Hspa9         | 0.127758 | 0.037511 |
| Tsen34        | 0.128146 | 0.029161 |
| Gmcl1         | 0.128941 | 0.035155 |
| Lrrc14        | 0.129037 | 0.019641 |
| Dhdds         | 0.129202 | 0.039461 |
| Ap1gbp1       | 0.129365 | 0.037453 |
| Nucb1         | 0.13063  | 0.036566 |
| 1500001M20Rik | 0.130995 | 0.044226 |
| Ercc3         | 0.131045 | 0.031274 |
| Ccdc95        | 0.131078 | 0.043305 |
| Tmod3         | 0.131546 | 0.042366 |
| Tsfm          | 0.131547 | 0.045148 |
| Gtf3c1        | 0.131584 | 0.039774 |
| Kptn          | 0.131589 | 0.040549 |
| Elp3          | 0.131826 | 0.044968 |
| 1700055N04Rik | 0.132112 | 0.039167 |
| Git2          | 0.13214  | 0.040988 |
| Upf1          | 0.132318 | 0.049411 |
| Thop1         | 0.133129 | 0.049438 |
| Nudt16l1      | 0.13363  | 0.043024 |
| Pi4kb         | 0.134159 | 0.046515 |
| Fbl           | 0.134202 | 0.03727  |
| Ccdc100       | 0.13424  | 0.049503 |
| 1810048J11Rik | 0.134806 | 0.043728 |
| Sh3bp5l       | 0.134844 | 0.043399 |
| Centg2        | 0.134989 | 0.021942 |
| Atp6v0a2      | 0.135077 | 0.03152  |

|                    |          |          |
|--------------------|----------|----------|
| Rhod               | 0.135522 | 0.028938 |
| Paf1               | 0.135794 | 0.028069 |
| Zbtb7b             | 0.136074 | 0.048259 |
| Eno1               | 0.136147 | 0.036161 |
| D2Erttd391e        | 0.136286 | 0.033326 |
| Cln3               | 0.13651  | 0.04254  |
| Slc39a9            | 0.136768 | 0.049257 |
| Yrdc               | 0.137142 | 0.038871 |
| Spna2              | 0.137577 | 0.032885 |
| Polr1e             | 0.13782  | 0.041291 |
| Mett10d            | 0.137835 | 0.042412 |
| Nol1               | 0.137869 | 0.024167 |
| Csrp1              | 0.137982 | 0.046134 |
| Gabpb2             | 0.138058 | 0.049216 |
| Arhgef3            | 0.138089 | 0.033982 |
| Sart1              | 0.13809  | 0.038761 |
| Rexo2              | 0.138126 | 0.044614 |
| Tnpo2              | 0.138605 | 0.017683 |
| OTTMUSG00000014597 | 0.138823 | 0.04688  |
| Snd1               | 0.138938 | 0.047877 |
| Gak                | 0.139014 | 0.040527 |
| Cdk5rap3           | 0.139181 | 0.047276 |
| LOC626152          | 0.1392   | 0.020343 |
| Gnptab             | 0.139236 | 0.042174 |
| Nlk                | 0.139256 | 0.033774 |
| Cdk4               | 0.139525 | 0.044831 |
| 2010204K13Rik      | 0.139802 | 0.044242 |
| Mid1               | 0.139804 | 0.035844 |
| Usp19              | 0.139812 | 0.033029 |
| Tll12              | 0.139827 | 0.03694  |
| Arfgef2            | 0.14061  | 0.043868 |
| Gfm1               | 0.141221 | 0.039332 |
| Ccdc94             | 0.141817 | 0.04651  |
| Gdap2              | 0.141874 | 0.030173 |
| Frap1              | 0.141998 | 0.032449 |
| Ext2               | 0.142562 | 0.04967  |
| Ube2f              | 0.142669 | 0.043528 |
| Harbi1             | 0.142808 | 0.04493  |
| Spg11              | 0.142907 | 0.033682 |
| Acot8              | 0.142999 | 0.013835 |
| Cacybp             | 0.143023 | 0.043232 |
| Tpp1               | 0.143109 | 0.031864 |
| Dgcr2              | 0.143232 | 0.046134 |
| Pdcd11             | 0.143309 | 0.018141 |
| Mis12              | 0.143392 | 0.042237 |
| Zfp592             | 0.144017 | 0.021354 |
| Wdr18              | 0.144506 | 0.031796 |
| Mta1               | 0.144638 | 0.025914 |
| Ddx23              | 0.145099 | 0.035146 |

|               |          |          |
|---------------|----------|----------|
| Sart3         | 0.145131 | 0.040823 |
| Prcc          | 0.145448 | 0.045594 |
| Mrpl12        | 0.145523 | 0.041594 |
| Pi4ka         | 0.14573  | 0.039049 |
| Cnpy2         | 0.145985 | 0.027466 |
| Ccbl1         | 0.146702 | 0.048894 |
| Eno1          | 0.146968 | 0.027711 |
| Ddx54         | 0.147261 | 0.037068 |
| Cldn12        | 0.147468 | 0.038897 |
| Afg3l1        | 0.147709 | 0.020574 |
| Erlin2        | 0.147777 | 0.0274   |
| Ercc4         | 0.147908 | 0.041356 |
| Txndc15       | 0.1484   | 0.037277 |
| Tgfbrap1      | 0.148425 | 0.040823 |
| 6430548M08Rik | 0.14848  | 0.042683 |
| Gtpbp1        | 0.148534 | 0.024486 |
| Rae1          | 0.148554 | 0.041487 |
| Tbl1x         | 0.14861  | 0.034635 |
| Cherp         | 0.148682 | 0.045564 |
| Sertad3       | 0.148817 | 0.030332 |
| Parvg         | 0.14891  | 0.039012 |
| Timm44        | 0.148984 | 0.012696 |
| Psmf1         | 0.149019 | 0.038718 |
| 100040879     | 0.149145 | 0.030285 |
| C530043G21Rik | 0.149188 | 0.038766 |
| A630047E20Rik | 0.149325 | 0.031199 |
| Pold2         | 0.14938  | 0.040878 |
| Zdhhc14       | 0.14969  | 0.036583 |
| BC004004      | 0.149693 | 0.039818 |
| Tm9sf4        | 0.149855 | 0.041851 |
| Hmgcl         | 0.149949 | 0.035708 |
| Tmem39b       | 0.15075  | 0.046603 |
| Ranbp6        | 0.150953 | 0.021311 |
| Clcn7         | 0.150983 | 0.042559 |
| Ppan          | 0.151016 | 0.04712  |
| Slbp          | 0.15139  | 0.031353 |
| Sfmbt1        | 0.151401 | 0.037051 |
| Wwc2          | 0.151619 | 0.044254 |
| Mrps5         | 0.151685 | 0.025912 |
| Pprc1         | 0.151835 | 0.049398 |
| Spg7          | 0.151886 | 0.02422  |
| Cdc6          | 0.152054 | 0.032011 |
| U2af2         | 0.152239 | 0.024535 |
| Parl          | 0.152326 | 0.041392 |
| 3930401K13Rik | 0.152436 | 0.026263 |
| Nat11         | 0.15256  | 0.024748 |
| Uap1l1        | 0.152635 | 0.042928 |
| Slc10a7       | 0.152855 | 0.044949 |
| Sys1          | 0.152863 | 0.02729  |

|               |          |          |
|---------------|----------|----------|
| Phb2          | 0.15288  | 0.045827 |
| Heatr6        | 0.152981 | 0.021326 |
| Sars          | 0.153143 | 0.024215 |
| Noc3l         | 0.153163 | 0.047926 |
| Slc7a5        | 0.153248 | 0.041601 |
| Ascc3l1       | 0.153293 | 0.027426 |
| Taf12         | 0.153563 | 0.037847 |
| Eif2ak3       | 0.153766 | 0.02107  |
| Cyp2r1        | 0.15404  | 0.04991  |
| Prmt2         | 0.154103 | 0.045132 |
| Ift172        | 0.154673 | 0.039101 |
| Mxd4          | 0.154737 | 0.04093  |
| Mrs2          | 0.155089 | 0.04074  |
| Golgb1        | 0.155107 | 0.031654 |
| BC057893      | 0.15549  | 0.036855 |
| Gart          | 0.155734 | 0.019435 |
| Rab35         | 0.155826 | 0.026213 |
| Prelid2       | 0.155927 | 0.047611 |
| Telo2         | 0.156058 | 0.032122 |
| Mbtps1        | 0.156208 | 0.020969 |
| Pgm1          | 0.156375 | 0.018483 |
| Ctdspl        | 0.156454 | 0.029635 |
| Pgam1         | 0.156672 | 0.042057 |
| Wdsub1        | 0.156699 | 0.028709 |
| Syf2          | 0.156832 | 0.028794 |
| Prkd3         | 0.156923 | 0.015734 |
| Syne2         | 0.156959 | 0.015794 |
| Mlx           | 0.157009 | 0.043867 |
| Man1b1        | 0.157035 | 0.013429 |
| Jagn1         | 0.157061 | 0.042839 |
| Ecd           | 0.157207 | 0.047009 |
| Gpr180        | 0.157214 | 0.021657 |
| Asna1         | 0.157632 | 0.04204  |
| Prpf3         | 0.157746 | 0.017167 |
| Tars2         | 0.157983 | 0.025168 |
| Rragb         | 0.157986 | 0.017641 |
| 4933426G20Rik | 0.158295 | 0.029172 |
| Dcun1d3       | 0.159224 | 0.039988 |
| Dsn1          | 0.159309 | 0.04338  |
| Mettl1        | 0.159758 | 0.042011 |
| Uprt          | 0.160212 | 0.027912 |
| Ruvbl2        | 0.160239 | 0.027662 |
| Prep          | 0.160353 | 0.049224 |
| Abt1          | 0.160487 | 0.043915 |
| EG627967      | 0.160734 | 0.030778 |
| Mocs1         | 0.16096  | 0.032809 |
| Htf9c         | 0.161037 | 0.03535  |
| Ppig          | 0.161206 | 0.033893 |
| Alg2          | 0.161331 | 0.035439 |

|                    |          |          |
|--------------------|----------|----------|
| Pde8a              | 0.161436 | 0.032357 |
| Pkp4               | 0.161474 | 0.043771 |
| Dguok              | 0.161588 | 0.045048 |
| Nudt9              | 0.161693 | 0.034849 |
| Mtrr               | 0.161759 | 0.03142  |
| Plscr1             | 0.162493 | 0.024197 |
| Zc3h13             | 0.162594 | 0.028174 |
| Myo1b              | 0.162867 | 0.041135 |
| Qtrtd1             | 0.162958 | 0.026354 |
| Adck1              | 0.162972 | 0.030937 |
| Sap30bp            | 0.163011 | 0.048301 |
| Pthr2              | 0.163035 | 0.033961 |
| Bfar               | 0.163191 | 0.02658  |
| Letm1              | 0.163192 | 0.026863 |
| Nbea               | 0.163377 | 0.021442 |
| Tspan3             | 0.163397 | 0.03377  |
| Ferd3l             | 0.163446 | 0.019131 |
| Fcgr3              | 0.163462 | 0.019515 |
| Eya3               | 0.163521 | 0.025625 |
| Rfng               | 0.163548 | 0.020963 |
| B4galnt1           | 0.163597 | 0.046726 |
| Las1l              | 0.163629 | 0.039491 |
| Tomm40l            | 0.163643 | 0.017323 |
| Copg               | 0.163662 | 0.045051 |
| Ptcd1              | 0.163696 | 0.045709 |
| Rpp14              | 0.163881 | 0.046831 |
| Diablo             | 0.163957 | 0.01016  |
| Scamp4             | 0.164244 | 0.034631 |
| Pak1ip1            | 0.16429  | 0.014029 |
| Cntln              | 0.164712 | 0.019014 |
| Dlst               | 0.165076 | 0.030032 |
| Man2c1             | 0.165323 | 0.034068 |
| Ap1s1              | 0.165402 | 0.025535 |
| Ddx41              | 0.165417 | 0.030851 |
| Slc5a6             | 0.165485 | 0.021729 |
| Mynn               | 0.165654 | 0.035678 |
| Lrsam1             | 0.165741 | 0.043691 |
| Snx17              | 0.1658   | 0.046885 |
| Sec14l2            | 0.165838 | 0.033057 |
| Trmt12             | 0.166112 | 0.021584 |
| 2410089E03Rik      | 0.166141 | 0.018635 |
| Edil3              | 0.166186 | 0.028447 |
| OTTMUSG00000000657 | 0.166286 | 0.030957 |
| Mrps34             | 0.166422 | 0.039373 |
| Stx2               | 0.166612 | 0.021123 |
| Mtap9              | 0.166679 | 0.03819  |
| Ndn12              | 0.166844 | 0.042542 |
| D430028G21Rik      | 0.166864 | 0.039686 |
| Tyw1               | 0.166954 | 0.027514 |



|                    |          |          |
|--------------------|----------|----------|
| Dcps               | 0.167223 | 0.030852 |
| Dnase1l3           | 0.167266 | 0.022199 |
| Cdk10              | 0.167456 | 0.013717 |
| Rpl7l1             | 0.167863 | 0.031678 |
| Slc35b1            | 0.168002 | 0.043606 |
| Lsm1               | 0.168058 | 0.043144 |
| Sf3b4              | 0.168137 | 0.015351 |
| Irf3               | 0.168192 | 0.027997 |
| Slc41a1            | 0.168431 | 0.026539 |
| Rangap1            | 0.16864  | 0.046945 |
| Smarcb1            | 0.169435 | 0.041601 |
| Zfp187             | 0.169487 | 0.049664 |
| Agpat6             | 0.169571 | 0.036819 |
| Wbp11              | 0.169572 | 0.018009 |
| Ppp1r15b           | 0.16976  | 0.028112 |
| Nr1h2              | 0.169761 | 0.014771 |
| Alg1               | 0.170515 | 0.021831 |
| Tsta3              | 0.170536 | 0.032247 |
| Srm                | 0.170593 | 0.02691  |
| Stom               | 0.170639 | 0.026045 |
| ENSMUSG00000002791 | 0.1708   | 0.024111 |
| OTTMUSG00000011448 | 0.171189 | 0.028061 |
| Rbm14              | 0.171321 | 0.01617  |
| Axl                | 0.171338 | 0.023961 |
| Dohh               | 0.1714   | 0.04782  |
| 1110005A23Rik      | 0.171516 | 0.048555 |
| Mrps7              | 0.171524 | 0.018134 |
| Cdk10              | 0.17154  | 0.027311 |
| Rnps1              | 0.171767 | 0.041419 |
| Mall               | 0.171798 | 0.015388 |
| Pak4               | 0.172075 | 0.011002 |
| Myg1               | 0.172163 | 0.009687 |
| D0HXS9928E         | 0.17224  | 0.025099 |
| Clp1               | 0.172279 | 0.0248   |
| Ccdc124            | 0.172873 | 0.029088 |
| Slc35b4            | 0.173074 | 0.035356 |
| Tubgcp4            | 0.173086 | 0.034285 |
| Rapgef3            | 0.173114 | 0.027856 |
| Mepce              | 0.17344  | 0.017564 |
| Arpc4              | 0.173561 | 0.048851 |
| Cyp4f13            | 0.173726 | 0.042788 |
| Ndufa8             | 0.173852 | 0.043976 |
| Pdia4              | 0.173875 | 0.028064 |
| Gbp1               | 0.174241 | 0.035586 |
| Samm50             | 0.174432 | 0.028002 |
| Pop4               | 0.174551 | 0.037171 |
| Ddx39              | 0.175007 | 0.01558  |
| Fen1               | 0.175231 | 0.014628 |
| Grwd1              | 0.175365 | 0.02675  |

|               |          |          |
|---------------|----------|----------|
| Pot1a         | 0.175763 | 0.008593 |
| Sipa1l1       | 0.176002 | 0.032916 |
| Wdr60         | 0.176285 | 0.008975 |
| Gars          | 0.176363 | 0.028814 |
| Iqcf3         | 0.176491 | 0.012639 |
| Cirh1a        | 0.176685 | 0.044937 |
| Slc25a32      | 0.177442 | 0.025697 |
| Chst12        | 0.177612 | 0.042645 |
| Ppt2          | 0.177748 | 0.039483 |
| Myl6          | 0.178049 | 0.043146 |
| R3hcc1        | 0.17842  | 0.035288 |
| Shkbp1        | 0.178554 | 0.0249   |
| Bop1          | 0.178584 | 0.02047  |
| Grpel1        | 0.178888 | 0.008574 |
| Erp29         | 0.179383 | 0.040432 |
| Tmem208       | 0.179422 | 0.043684 |
| Rpl23         | 0.179905 | 0.025503 |
| Chid1         | 0.180064 | 0.028734 |
| Entpd6        | 0.18051  | 0.043709 |
| St13          | 0.18056  | 0.041706 |
| LOC100048603  | 0.18059  | 0.026119 |
| Sap30l        | 0.180774 | 0.043282 |
| Tut1          | 0.180873 | 0.014672 |
| Tbc1d17       | 0.180873 | 0.020908 |
| Slc38a7       | 0.181229 | 0.010068 |
| Slc39a7       | 0.181284 | 0.015453 |
| Adck4         | 0.181544 | 0.018258 |
| Txndc5        | 0.182035 | 0.045309 |
| Nagk          | 0.182219 | 0.029789 |
| Gpr108        | 0.182229 | 0.033352 |
| Ascc1         | 0.182629 | 0.036007 |
| Nr2f6         | 0.183035 | 0.011741 |
| Gpatch1       | 0.183106 | 0.007236 |
| Exosc2        | 0.183309 | 0.017315 |
| Cbr4          | 0.183379 | 0.043625 |
| Mcm2          | 0.183678 | 0.029282 |
| Mrpl10        | 0.183927 | 0.015367 |
| Zbtb2         | 0.18428  | 0.031981 |
| Rpl23         | 0.184748 | 0.025368 |
| Gbp4          | 0.185008 | 0.019104 |
| Nkap          | 0.185207 | 0.047763 |
| Ldhb          | 0.185397 | 0.049263 |
| 3110040N11Rik | 0.185492 | 0.008709 |
| Myl9          | 0.186011 | 0.047443 |
| Tmed9         | 0.186606 | 0.012084 |
| AA673488      | 0.186954 | 0.006646 |
| Jag1          | 0.187315 | 0.009638 |
| Med31         | 0.187602 | 0.017537 |
| 1190005F20Rik | 0.187761 | 0.014675 |

|               |          |          |
|---------------|----------|----------|
| Sema4b        | 0.188019 | 0.021609 |
| Adcy3         | 0.188038 | 0.003842 |
| Prpf31        | 0.188154 | 0.02608  |
| 2510003E04Rik | 0.188165 | 0.034753 |
| Cope          | 0.188216 | 0.043806 |
| Ncbp2         | 0.188538 | 0.020158 |
| Dnaja3        | 0.18868  | 0.015687 |
| Nrbp2         | 0.189344 | 0.025754 |
| Phb           | 0.189654 | 0.019305 |
| Mrps33        | 0.189903 | 0.036163 |
| Creld2        | 0.189923 | 0.036598 |
| Psemb10       | 0.190089 | 0.02757  |
| Farsa         | 0.190113 | 0.02121  |
| L3mbtl2       | 0.190608 | 0.022813 |
| Zfp598        | 0.190634 | 0.007162 |
| Slc19a1       | 0.190787 | 0.032634 |
| Afap1         | 0.190852 | 0.046272 |
| Pira3         | 0.191264 | 0.029933 |
| Rrp1          | 0.191278 | 0.011801 |
| Srprb         | 0.191573 | 0.013897 |
| 1810032O08Rik | 0.191622 | 0.030746 |
| Vac14         | 0.191673 | 0.036986 |
| Pop5          | 0.19216  | 0.00899  |
| Bag4          | 0.192436 | 0.027739 |
| Stard8        | 0.19257  | 0.028681 |
| Ggcx          | 0.193989 | 0.02121  |
| Tbcb          | 0.194172 | 0.036798 |
| Fancm         | 0.194972 | 0.02813  |
| Terf2         | 0.195002 | 0.005099 |
| Rai12         | 0.195155 | 0.026523 |
| Gm1040        | 0.195402 | 0.020261 |
| Shb           | 0.195844 | 0.021164 |
| Tufm          | 0.195881 | 0.017073 |
| Ppp4c         | 0.19673  | 0.034257 |
| Aarsd1        | 0.196744 | 0.023321 |
| Flot2         | 0.197162 | 0.040653 |
| Usp5          | 0.197391 | 0.048784 |
| Prmt6         | 0.197502 | 0.008074 |
| Suclg1        | 0.197601 | 0.039126 |
| Tmed3         | 0.197646 | 0.027516 |
| Coq6          | 0.197881 | 0.037213 |
| Lgi4          | 0.198667 | 0.024689 |
| Prkcsh        | 0.198773 | 0.034519 |
| Cotl1         | 0.199348 | 0.038495 |
| Lrrc8c        | 0.199537 | 0.040733 |
| Frrs1         | 0.200056 | 0.018751 |
| 5830443L24Rik | 0.200302 | 0.036475 |
| Faim          | 0.20038  | 0.043968 |
| Upf3a         | 0.200386 | 0.007606 |
| Dnpep         | 0.200513 | 0.021256 |

|               |          |          |
|---------------|----------|----------|
| Ogfod1        | 0.201113 | 0.00799  |
| 0610031J06Rik | 0.201319 | 0.047228 |
| Mafg          | 0.201418 | 0.025585 |
| Ssr2          | 0.202124 | 0.025697 |
| Rpusd4        | 0.202474 | 0.022083 |
| Cyp2j6        | 0.202597 | 0.047677 |
| Hyou1         | 0.202612 | 0.045371 |
| Il10          | 0.202723 | 0.021215 |
| Phb           | 0.202861 | 0.022167 |
| Aldh18a1      | 0.203108 | 0.016617 |
| Imp4          | 0.20323  | 0.03771  |
| Rad50         | 0.203656 | 0.00771  |
| Syne2         | 0.203666 | 0.002704 |
| Mrps33        | 0.203887 | 0.03079  |
| 2310011J03Rik | 0.20411  | 0.014979 |
| Nudt22        | 0.204336 | 0.033481 |
| Angptl3       | 0.205283 | 0.042336 |
| Oprs1         | 0.20552  | 0.028432 |
| Lama4         | 0.205781 | 0.048876 |
| Hadha         | 0.206074 | 0.046703 |
| Prkaca        | 0.206075 | 0.035234 |
| Taf5          | 0.206122 | 0.011102 |
| Crip2         | 0.206462 | 0.043496 |
| 1110049F12Rik | 0.207157 | 0.038472 |
| Sf3a1         | 0.207168 | 0.019473 |
| Wars          | 0.207391 | 0.013553 |
| Tufm          | 0.207917 | 0.00845  |
| 4930504E06Rik | 0.207996 | 0.007314 |
| Hoxc8         | 0.208493 | 0.022119 |
| Usp49         | 0.208552 | 0.016967 |
| Pecr          | 0.209243 | 0.026803 |
| 9030617O03Rik | 0.21009  | 0.031575 |
| Mmaa          | 0.210159 | 0.027865 |
| Slc39a10      | 0.210292 | 0.022427 |
| Gtf2e1        | 0.210478 | 0.02468  |
| Mtmr9         | 0.210951 | 0.013508 |
| Capg          | 0.210993 | 0.012135 |
| Gss           | 0.21106  | 0.047225 |
| Qdpr          | 0.211114 | 0.028929 |
| Crtap         | 0.211444 | 0.036781 |
| Tagln         | 0.211552 | 0.037706 |
| Npr2          | 0.211656 | 0.039991 |
| Pla2g2d       | 0.21222  | 0.028729 |
| Zfat          | 0.213478 | 0.008062 |
| Ctnnb1        | 0.213904 | 0.021964 |
| Smpd1         | 0.214137 | 0.026484 |
| Cgnl1         | 0.214221 | 0.033916 |
| Lman2         | 0.215493 | 0.019381 |
| Plod3         | 0.21662  | 0.010742 |

|                    |          |          |
|--------------------|----------|----------|
| Kank3              | 0.216853 | 0.026816 |
| Xpnpep3            | 0.217114 | 0.040996 |
| Ddhd2              | 0.217159 | 0.048344 |
| 666761             | 0.217169 | 0.022746 |
| Slc26a4            | 0.217243 | 0.007917 |
| Katnal1            | 0.218036 | 0.010587 |
| Psat1              | 0.218865 | 0.02825  |
| N6amt2             | 0.218876 | 0.048091 |
| Dus2l              | 0.219671 | 0.027533 |
| A230067G21Rik      | 0.221068 | 0.005492 |
| Crls1              | 0.221202 | 0.0458   |
| Cyyr1              | 0.221216 | 0.035881 |
| Mcm3               | 0.221294 | 0.02291  |
| Spnb2              | 0.22147  | 0.033885 |
| Taf11              | 0.222148 | 0.00541  |
| Nat9               | 0.223007 | 0.012913 |
| Gstm4              | 0.223024 | 0.039692 |
| Gsto2              | 0.223216 | 0.036548 |
| Zfp294             | 0.223403 | 0.006569 |
| Prdm9              | 0.223682 | 0.010702 |
| Mrpl22             | 0.22417  | 0.041541 |
| Tubb2b             | 0.224257 | 0.028309 |
| Phlda3             | 0.224282 | 0.039321 |
| Slc22a5            | 0.225063 | 0.022274 |
| Dock6              | 0.225138 | 0.013651 |
| Itpk1              | 0.225147 | 0.048174 |
| Zc3h12a            | 0.225451 | 0.007051 |
| Cul7               | 0.225461 | 0.013604 |
| Rnpep              | 0.225708 | 0.028374 |
| Mut                | 0.225863 | 0.046398 |
| Hsd12              | 0.226774 | 0.045452 |
| Gnb5               | 0.227771 | 0.016616 |
| 4932441K18Rik      | 0.229172 | 0.044844 |
| Wrb                | 0.22968  | 0.008522 |
| Bphl               | 0.229775 | 0.038775 |
| Cth                | 0.23     | 0.014211 |
| 1500003O03Rik      | 0.23005  | 0.033848 |
| ENSMUSG00000071392 | 0.231512 | 0.005138 |
| Mtus1              | 0.233195 | 0.005718 |
| Igfbp4             | 0.23433  | 0.046121 |
| Cry2               | 0.234594 | 0.027204 |
| Taldo1             | 0.23501  | 0.03101  |
| Pomt1              | 0.235077 | 0.035157 |
| Alas1              | 0.235864 | 0.026406 |
| Cspp1              | 0.236014 | 0.009682 |
| Clpb               | 0.237032 | 0.018523 |
| Slc10a6            | 0.23715  | 0.036713 |
| Nme7               | 0.238413 | 0.011987 |
| Cxx1b              | 0.239926 | 0.04381  |

|               |          |          |
|---------------|----------|----------|
| Mertk         | 0.241155 | 0.043101 |
| Hrsp12        | 0.241477 | 0.04444  |
| Fkbp2         | 0.242594 | 0.016428 |
| Apex2         | 0.243413 | 0.008526 |
| Has3          | 0.243589 | 0.013628 |
| Pmm1          | 0.243678 | 0.011723 |
| Ttpa          | 0.245695 | 0.007304 |
| Creg1         | 0.246031 | 0.031509 |
| Ttc27         | 0.246698 | 0.002841 |
| Ablim3        | 0.247028 | 0.004043 |
| Casp4         | 0.247236 | 0.019611 |
| Xdh           | 0.247535 | 0.030437 |
| Coasy         | 0.247776 | 0.024888 |
| Ear1          | 0.247997 | 0.023517 |
| Akr1e1        | 0.24816  | 0.009973 |
| Drg2          | 0.248449 | 0.013033 |
| Adra1a        | 0.248569 | 0.018977 |
| Ampd2         | 0.248809 | 0.006669 |
| Ppa1          | 0.249021 | 0.025931 |
| Pcdhb22       | 0.250766 | 0.023919 |
| Triap1        | 0.251814 | 0.014319 |
| Pex5          | 0.251816 | 0.023299 |
| Rpl13         | 0.252796 | 0.04254  |
| D2hgdh        | 0.252819 | 0.015113 |
| Spr2j         | 0.253216 | 0.034419 |
| Rpp40         | 0.253663 | 0.025597 |
| Mtg1          | 0.255209 | 0.017277 |
| Yipf3         | 0.25774  | 0.008746 |
| Rnf5          | 0.259822 | 0.03606  |
| Ptprg         | 0.260072 | 0.008184 |
| Eral1         | 0.260981 | 0.006463 |
| 2310061C15Rik | 0.261279 | 0.020172 |
| Abhd5         | 0.262318 | 0.036199 |
| Tmeff1        | 0.263592 | 0.04673  |
| Atp10d        | 0.26418  | 0.008021 |
| Degs2         | 0.264851 | 0.027302 |
| Acadsb        | 0.265701 | 0.03014  |
| Uchl5ip       | 0.267318 | 0.017758 |
| Lonp1         | 0.267888 | 0.002086 |
| Srpx          | 0.268348 | 0.024573 |
| Pygl          | 0.268452 | 0.008866 |
| Polr2i        | 0.269423 | 0.012731 |
| Hint2         | 0.273091 | 0.014557 |
| Agpat3        | 0.273309 | 0.04483  |
| Snord35b      | 0.273385 | 0.03712  |
| Tlr8          | 0.274775 | 0.049221 |
| Cbr3          | 0.27629  | 0.018108 |
| Fanci         | 0.277242 | 0.000845 |
| Hsd17b4       | 0.279452 | 0.029691 |

|               |          |          |
|---------------|----------|----------|
| Cyp4b1        | 0.280836 | 0.030512 |
| Ptplb         | 0.281459 | 0.014965 |
| Irak1bp1      | 0.283615 | 0.033624 |
| Sntb1         | 0.283697 | 0.047064 |
| Snrk          | 0.28382  | 0.00163  |
| Trap1         | 0.286188 | 0.026225 |
| Zfp637        | 0.286492 | 0.01544  |
| Scarb1        | 0.286877 | 0.029164 |
| Pold4         | 0.287706 | 0.043349 |
| Atp9a         | 0.288252 | 0.036294 |
| Gulp1         | 0.288254 | 0.000319 |
| Ak2           | 0.291075 | 0.016629 |
| 4932441K18Rik | 0.291305 | 0.01574  |
| 1810046J19Rik | 0.292891 | 0.002116 |
| Mccc2         | 0.293173 | 0.017009 |
| Entpd5        | 0.294107 | 0.024939 |
| Anxa3         | 0.295564 | 0.031017 |
| Asns          | 0.295883 | 0.030919 |
| Insr          | 0.296112 | 0.041332 |
| Adamts9       | 0.296884 | 0.037056 |
| Csad          | 0.297939 | 0.0257   |
| G6pdx         | 0.298027 | 0.017837 |
| Il1fb         | 0.300343 | 0.002404 |
| Acaa2         | 0.300516 | 0.042505 |
| F10           | 0.303798 | 0.048093 |
| Mfsd8         | 0.304012 | 0.03293  |
| Gnpat         | 0.306033 | 0.046253 |
| Tspan4        | 0.306507 | 0.01808  |
| Pp11r         | 0.308659 | 0.040583 |
| Hadh          | 0.310518 | 0.043749 |
| H6pd          | 0.316618 | 0.036383 |
| Ntrk2         | 0.317723 | 0.044723 |
| Comt          | 0.318351 | 0.041044 |
| Leprel1       | 0.320726 | 0.008414 |
| Palmd         | 0.322173 | 0.024766 |
| 2310042E22Rik | 0.322243 | 0.026161 |
| Steap4        | 0.323654 | 0.046589 |
| Slc9a6        | 0.330506 | 0.047944 |
| Tenc1         | 0.331184 | 0.037679 |
| Bcar3         | 0.359238 | 0.045436 |
| Mecr          | 0.360201 | 0.014395 |
| Gbp2          | 0.363605 | 0.028334 |
| Bscl2         | 0.365325 | 0.011735 |
| Pex11a        | 0.379716 | 0.024288 |
| Mgll          | 0.387841 | 0.038459 |
| 1100001G20Rik | 0.390513 | 0.021786 |
| Trf           | 0.390788 | 0.024652 |
| Ppp2r1b       | 0.391846 | 0.032701 |
| Pfkl          | 0.396348 | 0.00208  |

|               |          |          |
|---------------|----------|----------|
| Gnai1         | 0.396788 | 0.016571 |
| Ehhadh        | 0.400019 | 0.047034 |
| Cpt2          | 0.412258 | 0.034615 |
| EG626785      | 0.440782 | 0.001434 |
| Gstt2         | 0.448686 | 0.045386 |
| Id3           | 0.457744 | 0.024473 |
| Sfxn1         | 0.459008 | 0.028413 |
| Asah3l        | 0.47918  | 0.001688 |
| Acaca         | 0.48718  | 0.025686 |
| Acad11        | 0.500459 | 0.024214 |
| Sfrp4         | 0.514222 | 0.035332 |
| Mgl2          | 0.535517 | 0.018523 |
| Dlc1          | 0.554076 | 0.044425 |
| Slc1a3        | 0.560558 | 0.028196 |
| Chi3l3        | 0.58156  | 0.022181 |
| Aspa          | 0.584456 | 0.035218 |
| Abca8a        | 0.607574 | 0.046606 |
| Rbp7          | 0.692221 | 0.048274 |
| Sdpr          | 0.737569 | 0.045736 |
| Acsf1         | 0.740428 | 0.036117 |
| Lipe          | 0.770016 | 0.042404 |
| D430015B01Rik | 0.795781 | 0.034967 |
| Slc36a2       | 0.842079 | 0.046337 |
| Retsat        | 0.899542 | 0.037957 |
| Sycp3         | 0.909188 | 0.047779 |
| Ucp1          | 1.118152 | 0.038291 |
| Pck1          | 1.537555 | 0.033318 |

---
